# Supplementary material
Source: PubMed Central journal article supplement (PMC5047807)
Supplement: supp_4.3.E365_2015-0130-1-at.pdf [file supp_4.3.E365_2015-0130-1-at.pdf]

## Appendix 1 (as supplied by the authors): Detailed Results of HF Hospitalization Cost Evaluation in Canada, 2004- 2013

### ***National volume of HF patients from 2004- 2013***

We could only examine one turning point in each of the 8 studied groups by Joinpoint regression because of limited number of observations. Five knots were statistically significant at  $\alpha=0.05$  at 2006 for female/70-79 and male/70-79, 2008 for female/60-69 and female/ $\geq 80$ , and at 2010 for male/ $\geq 80$  groups. Results of the multiple linear regression model to estimate hospitalization prevalence rates are summarized in Table S1.1. Hospitalization prevalence rates from 2004 to 2013 are shown in detail in Table S1.2. In-patient HF population estimates from 2004 to 2013 are presented in detail in Table S1.3.

Table S1.1: Results of the multiple linear regression model to estimate HF hospitalization prevalence rates

| Variable                                                                        | Parameter estimate | 95% CI         | p-value |
|---------------------------------------------------------------------------------|--------------------|----------------|---------|
| Fiscal year                                                                     | -0.033             | -0.043, -0.022 | <0.001  |
| Sex                                                                             |                    |                |         |
| Male                                                                            | 0.194              | 0.147, 0.241   | <0.001  |
| Female (ref)                                                                    | --                 | --             | --      |
| Age group                                                                       |                    |                |         |
| <60 years                                                                       | -5.061             | -5.108, -5.015 | <0.001  |
| 60-69 years                                                                     | -2.427             | -2.472, -2.382 | <0.001  |
| 70-79 years                                                                     | -1.215             | -1.261, -1.170 | <0.001  |
| $\geq 80$ years (ref)                                                           | --                 | --             | --      |
| Knot                                                                            | 0.012              | -0.001, 0.025  | 0.079   |
| Interaction                                                                     |                    |                |         |
| Sex/<60 years                                                                   | 0.347              | 0.283, 0.412   | <0.001  |
| Sex/60-69 years                                                                 | 0.327              | 0.258, 0.396   | <0.001  |
| Sex/70-79 years                                                                 | 0.183              | 0.118, 0.248   | <0.001  |
| Adjusted R-square=0.999; Intercept= 49.720; Model assumptions' check satisfied. |                    |                |         |

Table S1.2: Estimated HF hospitalization prevalence rate per 100,000 populations by sex and age in Canada, 2004- 2013

| Fiscal Year | Female |       |       |       | Male |       |       |       |
|-------------|--------|-------|-------|-------|------|-------|-------|-------|
|             | <60    | 60-69 | 70-79 | >=80  | <60  | 60-69 | 70-79 | >=80  |
| 2004        | 12     | 168   | 551   | 1,902 | 20   | 270   | 803   | 2,363 |
| 2005        | 11     | 163   | 533   | 1,841 | 19   | 264   | 778   | 2,287 |
| 2006        | 11     | 157   | 516   | 1,782 | 19   | 259   | 753   | 2,214 |
| 2007        | 11     | 152   | 506   | 1,725 | 19   | 253   | 737   | 2,142 |
| 2008        | 11     | 147   | 495   | 1,669 | 18   | 248   | 721   | 2,073 |
| 2009        | 10     | 144   | 485   | 1,634 | 18   | 243   | 706   | 2,007 |
| 2010        | 10     | 141   | 475   | 1,600 | 17   | 238   | 692   | 1,942 |
| 2011        | 10     | 138   | 465   | 1,567 | 17   | 233   | 677   | 1,902 |
| 2012        | 10     | 135   | 455   | 1,534 | 17   | 228   | 663   | 1,862 |
| 2013        | 10     | 133   | 445   | 1,502 | 16   | 223   | 649   | 1,823 |

Table S1.3: In-patient HF population estimates in Canada, 2004- 2013

| Fiscal Year | Canadian population estimates | Number of HF patients hospitalized |                    |                    |
|-------------|-------------------------------|------------------------------------|--------------------|--------------------|
|             |                               | Estimated average                  | 95% CI lower bound | 95% CI upper bound |
| 2004        | 31,938,004                    | 44,355                             | 42,446             | 46,235             |
| 2005        | 32,242,364                    | 44,184                             | 42,492             | 45,827             |
| 2006        | 32,570,505                    | 44,147                             | 42,583             | 45,653             |
| 2007        | 32,887,928                    | 44,095                             | 42,618             | 45,509             |
| 2008        | 33,245,773                    | 44,065                             | 42,582             | 45,485             |
| 2009        | 33,628,571                    | 44,196                             | 42,709             | 45,620             |
| 2010        | 34,005,274                    | 44,404                             | 42,859             | 45,889             |
| 2011        | 34,342,780                    | 44,718                             | 43,141             | 46,235             |
| 2012        | 34,752,128                    | 45,140                             | 43,499             | 46,725             |
| 2013        | 35,154,279                    | 45,562                             | 43,830             | 47,244             |

### **Annual hospitalization costs per HF patient from 2004 - 2013**

168,130 HF hospitalizations representing 134,257 patients from 2009 to 2012 were matched with Canadian Institute for Health Information patient cost estimate data. Costs of 2% of hospitalizations (n=3,042, containing 7 case mix groups) with no matching patient cost data were derived from the Ontario Cost Analysis Tool. Results of the generalized linear model to estimate annual hospitalization costs per a HF patient are summarized in Table S1.4. Annual hospitalization costs per a HF patient are shown in detail in Table S1.5. Total HF hospitalization cost estimates are presented in detail in Table S1.6.

Table S1.4: Results of the generalized linear model to estimate annual costs per HF patient hospitalized

| Variable                                                       | Parameter estimate | 95% CI         | p-value |
|----------------------------------------------------------------|--------------------|----------------|---------|
| Fiscal year                                                    | 0.014              | 0.011, 0.017   | <0.001  |
| Sex                                                            |                    |                |         |
| Male                                                           | 0.028              | 0.022, 0.035   | <0.001  |
| Female (ref)                                                   | --                 | --             | --      |
| Age group                                                      |                    |                |         |
| <60 years (ref)                                                | --                 | --             | --      |
| 60-69 years                                                    | -0.013             | -0.032, -0.006 | 0.190   |
| 70-79 years                                                    | -0.056             | -0.074, -0.038 | <0.001  |
| >=80 years                                                     | -0.142             | -0.159, -0.125 | <0.001  |
| Intercept= -18.662; gamma distribution and log link were used. |                    |                |         |

Table S1.5: Annual hospitalization cost per a HF patient by sex and age in Canada (in 2014 \$-values), 2004- 2013

| Fiscal Year | Patient average | Female |        |        |       | Male   |        |        |        |
|-------------|-----------------|--------|--------|--------|-------|--------|--------|--------|--------|
|             |                 | <60    | 60-69  | 70-79  | >=80  | <60    | 60-69  | 70-79  | >=80   |
| 2004        | 9,679           | 10,044 | 9,917  | 9,498  | 8,714 | 10,331 | 10,200 | 9,770  | 8,963  |
| 2005        | 9,815           | 10,185 | 10,055 | 9,631  | 8,836 | 10,476 | 10,343 | 9,907  | 9,088  |
| 2006        | 9,952           | 10,327 | 10,196 | 9,766  | 8,959 | 10,622 | 10,488 | 10,045 | 9,215  |
| 2007        | 10,092          | 10,472 | 10,339 | 9,903  | 9,085 | 10,771 | 10,635 | 10,186 | 9,345  |
| 2008        | 10,233          | 10,619 | 10,484 | 10,042 | 9,212 | 10,922 | 10,784 | 10,329 | 9,475  |
| 2009        | 10,377          | 10,767 | 10,631 | 10,182 | 9,341 | 11,075 | 10,935 | 10,473 | 9,608  |
| 2010        | 10,522          | 10,918 | 10,780 | 10,325 | 9,472 | 11,230 | 11,088 | 10,620 | 9,743  |
| 2011        | 10,669          | 11,071 | 10,931 | 10,470 | 9,605 | 11,387 | 11,243 | 10,769 | 9,879  |
| 2012        | 10,819          | 11,226 | 11,084 | 10,616 | 9,739 | 11,547 | 11,401 | 10,920 | 10,018 |
| 2013        | 10,970          | 11,383 | 11,239 | 10,765 | 9,876 | 11,709 | 11,560 | 11,073 | 10,158 |

Table S1.6: Annual HF hospitalization cost estimates in Canada (in million, 2014 \$-values), 2004- 2013

| Fiscal Year | Total HF hospitalization costs |                    |                    |
|-------------|--------------------------------|--------------------|--------------------|
|             | Estimated average              | 95% CI lower bound | 95% CI upper bound |
| 2004        | 415                            | 397                | 432                |
| 2005        | 419                            | 403                | 434                |
| 2006        | 424                            | 409                | 438                |
| 2007        | 429                            | 415                | 443                |
| 2008        | 435                            | 421                | 449                |
| 2009        | 443                            | 428                | 457                |
| 2010        | 451                            | 435                | 466                |
| 2011        | 460                            | 444                | 476                |
| 2012        | 471                            | 454                | 488                |
| 2013        | 482                            | 464                | 500                |
