# Supplementary material
Source: PubMed Central journal article supplement (PMC5047807)
Supplement: supp_4.3.E365_2015-0130-2-at.pdf [file supp_4.3.E365_2015-0130-2-at.pdf]

## Appendix 2 (as supplied by the authors): Detailed Results of HF Hospitalization Cost Projection in Canada, 2014- 2030

### ***Projection of national volume of HF patients from 2014- 2030***

Expected HF hospitalization prevalence rates from 2014 to 2030 are shown in detail in Table S2.1. Annual in-patient HF population projections from 2014 to 2030 are presented in detail in Table S2.2

Table S2.1: Estimated HF hospitalization prevalence rate per 100,000 populations by sex and age in Canada, 2014- 2030

| Fiscal Year | Female |       |       |       | Male |       |       |       |
|-------------|--------|-------|-------|-------|------|-------|-------|-------|
|             | <60    | 60-69 | 70-79 | >=80  | <60  | 60-69 | 70-79 | >=80  |
| 2014        | 9      | 130   | 436   | 1,471 | 16   | 219   | 636   | 1,785 |
| 2015        | 9      | 127   | 427   | 1,440 | 16   | 214   | 623   | 1,748 |
| 2016        | 9      | 125   | 418   | 1,410 | 15   | 210   | 610   | 1,711 |
| 2017        | 9      | 122   | 409   | 1,381 | 15   | 205   | 597   | 1,676 |
| 2018        | 9      | 119   | 401   | 1,352 | 15   | 201   | 584   | 1,641 |
| 2019        | 8      | 117   | 393   | 1,324 | 14   | 197   | 572   | 1,607 |
| 2020        | 8      | 114   | 384   | 1,296 | 14   | 193   | 560   | 1,573 |
| 2021        | 8      | 112   | 376   | 1,269 | 14   | 189   | 549   | 1,540 |
| 2022        | 8      | 110   | 369   | 1,243 | 14   | 185   | 537   | 1,508 |
| 2023        | 8      | 107   | 361   | 1,217 | 13   | 181   | 526   | 1,477 |
| 2024        | 8      | 105   | 353   | 1,191 | 13   | 177   | 515   | 1,446 |
| 2025        | 7      | 103   | 346   | 1,167 | 13   | 173   | 504   | 1,416 |
| 2026        | 7      | 101   | 339   | 1,142 | 12   | 170   | 494   | 1,386 |
| 2027        | 7      | 99    | 332   | 1,118 | 12   | 166   | 483   | 1,357 |
| 2028        | 7      | 97    | 325   | 1,095 | 12   | 163   | 473   | 1,329 |
| 2029        | 7      | 95    | 318   | 1,072 | 12   | 159   | 464   | 1,301 |
| 2030        | 7      | 93    | 311   | 1,050 | 11   | 156   | 454   | 1,274 |

Table S2.2: In-patient HF population projection in Canada, 2014- 2030

| Fiscal Year | Canadian population projection | Number of HF patients hospitalized |                    |                    |
|-------------|--------------------------------|------------------------------------|--------------------|--------------------|
|             |                                | Expected                           | 95% CI lower bound | 95% CI upper bound |
| 2014        | 35,515,400                     | 45,834                             | 43,992             | 47,633             |
| 2015        | 35,872,400                     | 46,137                             | 44,164             | 48,078             |
| 2016        | 36,229,100                     | 46,472                             | 44,347             | 48,576             |
| 2017        | 36,584,200                     | 46,922                             | 44,625             | 49,213             |
| 2018        | 36,939,900                     | 47,367                             | 44,884             | 49,861             |
| 2019        | 37,294,400                     | 47,789                             | 45,111             | 50,499             |
| 2020        | 37,646,400                     | 48,203                             | 45,320             | 51,140             |
| 2021        | 37,997,700                     | 48,671                             | 45,572             | 51,850             |
| 2022        | 38,345,800                     | 49,130                             | 45,808             | 52,561             |
| 2023        | 38,693,200                     | 49,683                             | 46,125             | 53,382             |
| 2024        | 39,039,800                     | 50,270                             | 46,466             | 54,250             |
| 2025        | 39,383,200                     | 50,836                             | 46,782             | 55,104             |
| 2026        | 39,724,100                     | 51,435                             | 47,122             | 56,003             |
| 2027        | 40,062,100                     | 52,269                             | 47,672             | 57,165             |
| 2028        | 40,395,000                     | 52,998                             | 48,120             | 58,226             |
| 2029        | 40,723,200                     | 53,622                             | 48,465             | 59,180             |
| 2030        | 41,046,600                     | 54,196                             | 48,759             | 60,089             |

**Projection of annual hospitalization costs per HF patient from 2014- 2030**

Annual hospitalization costs per a HF patient are shown in detail in Table S2.3. Total HF annual hospitalization costs are presented in detail in Table S2.4.

Table S2.3: Annual hospitalization cost per HF patient by sex and age in Canada (in 2014 \$-values), 2014- 2030

| Fiscal Year | Patient average | Female |        |        |        | Male   |        |        |        |
|-------------|-----------------|--------|--------|--------|--------|--------|--------|--------|--------|
|             |                 | <60    | 60-69  | 70-79  | >=80   | <60    | 60-69  | 70-79  | >=80   |
| 2014        | 11,124          | 11,543 | 11,397 | 10,916 | 10,014 | 11,873 | 11,722 | 11,228 | 10,300 |
| 2015        | 11,280          | 11,705 | 11,556 | 11,069 | 10,154 | 12,039 | 11,886 | 11,385 | 10,445 |

|      |        |        |        |        |        |        |        |        |        |
|------|--------|--------|--------|--------|--------|--------|--------|--------|--------|
| 2016 | 11,438 | 11,869 | 11,718 | 11,224 | 10,297 | 12,208 | 12,053 | 11,545 | 10,591 |
| 2017 | 11,598 | 12,035 | 11,882 | 11,381 | 10,441 | 12,379 | 12,222 | 11,706 | 10,739 |
| 2018 | 11,761 | 12,203 | 12,049 | 11,540 | 10,587 | 12,552 | 12,393 | 11,870 | 10,890 |
| 2019 | 11,925 | 12,374 | 12,217 | 11,702 | 10,735 | 12,728 | 12,567 | 12,036 | 11,042 |
| 2020 | 12,092 | 12,548 | 12,389 | 11,866 | 10,886 | 12,906 | 12,743 | 12,205 | 11,197 |
| 2021 | 12,262 | 12,723 | 12,562 | 12,032 | 11,038 | 13,087 | 12,921 | 12,376 | 11,354 |
| 2022 | 12,433 | 12,902 | 12,738 | 12,201 | 11,193 | 13,270 | 13,102 | 12,549 | 11,513 |
| 2023 | 12,608 | 13,082 | 12,917 | 12,372 | 11,350 | 13,456 | 13,286 | 12,725 | 11,674 |
| 2024 | 12,784 | 13,266 | 13,097 | 12,545 | 11,509 | 13,645 | 13,472 | 12,903 | 11,837 |
| 2025 | 12,963 | 13,451 | 13,281 | 12,721 | 11,670 | 13,836 | 13,660 | 13,084 | 12,003 |
| 2026 | 13,145 | 13,640 | 13,467 | 12,899 | 11,833 | 14,030 | 13,852 | 13,267 | 12,171 |
| 2027 | 13,329 | 13,831 | 13,656 | 13,080 | 11,999 | 14,226 | 14,046 | 13,453 | 12,342 |
| 2028 | 13,516 | 14,025 | 13,847 | 13,263 | 12,167 | 14,425 | 14,243 | 13,642 | 12,515 |
| 2029 | 13,705 | 14,221 | 14,041 | 13,449 | 12,338 | 14,628 | 14,442 | 13,833 | 12,690 |
| 2030 | 13,897 | 14,420 | 14,238 | 13,637 | 12,510 | 14,832 | 14,644 | 14,027 | 12,868 |

Table S2.4: HF hospitalization cost projection in Canada (in million, 2014 \$-values), 2014-2030

| Fiscal Year | Total HF hospitalization cost |                    |                    |
|-------------|-------------------------------|--------------------|--------------------|
|             | Expected                      | 95% CI lower bound | 95% CI upper bound |
| 2014        | 492                           | 472                | 511                |
| 2015        | 502                           | 481                | 523                |
| 2016        | 513                           | 490                | 536                |
| 2017        | 525                           | 500                | 551                |
| 2018        | 538                           | 510                | 566                |
| 2019        | 550                           | 519                | 582                |
| 2020        | 563                           | 529                | 597                |
| 2021        | 576                           | 540                | 614                |
| 2022        | 590                           | 550                | 631                |
| 2023        | 605                           | 561                | 650                |
| 2024        | 620                           | 573                | 669                |
| 2025        | 635                           | 585                | 689                |
| 2026        | 651                           | 597                | 709                |
| 2027        | 670                           | 611                | 733                |
| 2028        | 688                           | 625                | 757                |
| 2029        | 706                           | 638                | 779                |
| 2030        | 722                           | 650                | 801                |
