# Supplementary material
Source: PubMed Central journal article supplement (PMC5047807)
Supplement: supp_4.3.E365_2015-0130-3-at.pdf [file supp_4.3.E365_2015-0130-3-at.pdf]

## Appendix 3 (as supplied by the authors): Detailed Results of Estimates and Projection of HF Associated Hospitalization Costs in Canada, 2004-2030

### *Estimates and projection of annual volume of patients with HF from 2004- 2030*

We could only examine one turning point in each of the 8 studied groups by Joinpoint regression because of limited number of observations. Seven knots were statistically significant at  $\alpha=0.05$  at 2006 for male/ $\leq 60$ ; at 2007 for female/ $\geq 80$  and male/ $\geq 80$ ; at 2009 for female/60-69, female/70-79, and male/70-79; and at 2010 for male/60-69 groups. Results of the multiple linear regression model to estimate hospitalization prevalence rates are summarized in Table S3.1. Hospitalization prevalence rates from 2004 to 2030 are shown in detail in Table S3.2. In-patient HF population estimates and projection from 2004 to 2030 are presented in detail in Table S3.3.

Table S3.1: Results of the multiple linear regression model to estimate hospitalization prevalence rates

| Variable                                                                        | Parameter estimate | 95% CI         | p-value |
|---------------------------------------------------------------------------------|--------------------|----------------|---------|
| Fiscal year                                                                     | -0.047             | -0.051, -0.043 | <0.001  |
| Sex                                                                             |                    |                |         |
| Male                                                                            | 0.202              | 0.179, 0.224   | <0.001  |
| Female (ref)                                                                    | --                 |                | --      |
| Age group                                                                       |                    |                |         |
| <60 years                                                                       | -4.914             | -4.937, -4.891 | <0.001  |
| 60-69 years                                                                     | -2.394             | -2.417, -2.370 | <0.001  |
| 70-79 years                                                                     | -1.208             | -1.231, -1.184 | <0.001  |
| $\geq 80$ years (ref)                                                           | --                 | --             | --      |
| Knot                                                                            | 0.038              | 0.032, 0.044   | <0.001  |
| Interaction                                                                     |                    |                |         |
| Sex/<60 years                                                                   | 0.223              | 0.191, 0.255   | <0.001  |
| Sex/60-69 years                                                                 | 0.213              | 0.181, 0.245   | <0.001  |
| Sex/70-79 years                                                                 | 0.125              | 0.093, 0.157   | 0.002   |
| Adjusted R-square=0.999; Intercept= 26.351; Model assumptions' check satisfied. |                    |                |         |

Table S3.2: Estimated HF associated hospitalization prevalence rate per 100,000 populations by sex and age in Canada, 2004- 2030

| Fiscal Year | Female |       |       |       | Male |       |       |       |
|-------------|--------|-------|-------|-------|------|-------|-------|-------|
|             | <60    | 60-69 | 70-79 | >=80  | <60  | 60-69 | 70-79 | >=80  |
| 2004        | 32     | 475   | 1,554 | 4,820 | 52   | 747   | 2,156 | 5,897 |
| 2005        | 31     | 453   | 1,483 | 4,599 | 50   | 712   | 2,057 | 5,627 |
| 2006        | 31     | 432   | 1,415 | 4,388 | 47   | 680   | 1,962 | 5,369 |
| 2007        | 31     | 412   | 1,350 | 4,187 | 47   | 649   | 1,872 | 5,123 |
| 2008        | 30     | 394   | 1,288 | 4,150 | 47   | 619   | 1,787 | 5,077 |
| 2009        | 30     | 376   | 1,229 | 4,113 | 46   | 591   | 1,705 | 5,032 |
| 2010        | 30     | 372   | 1,218 | 4,076 | 46   | 563   | 1,690 | 4,987 |
| 2011        | 30     | 369   | 1,207 | 4,040 | 45   | 558   | 1,674 | 4,942 |
| 2012        | 29     | 366   | 1,197 | 4,004 | 45   | 553   | 1,659 | 4,898 |
| 2013        | 29     | 362   | 1,186 | 3,968 | 45   | 549   | 1,645 | 4,854 |
| 2014        | 29     | 359   | 1,175 | 3,932 | 44   | 544   | 1,630 | 4,811 |
| 2015        | 29     | 356   | 1,165 | 3,897 | 44   | 539   | 1,615 | 4,768 |
| 2016        | 28     | 353   | 1,154 | 3,862 | 43   | 534   | 1,601 | 4,725 |
| 2017        | 28     | 350   | 1,144 | 3,828 | 43   | 529   | 1,587 | 4,683 |
| 2018        | 28     | 346   | 1,134 | 3,794 | 43   | 524   | 1,572 | 4,641 |
| 2019        | 28     | 343   | 1,124 | 3,760 | 42   | 520   | 1,558 | 4,600 |
| 2020        | 27     | 340   | 1,114 | 3,726 | 42   | 515   | 1,545 | 4,559 |
| 2021        | 27     | 337   | 1,104 | 3,693 | 41   | 511   | 1,531 | 4,518 |
| 2022        | 27     | 334   | 1,094 | 3,660 | 41   | 506   | 1,517 | 4,478 |
| 2023        | 27     | 331   | 1,084 | 3,627 | 41   | 501   | 1,503 | 4,438 |
| 2024        | 26     | 328   | 1,075 | 3,595 | 40   | 497   | 1,490 | 4,398 |
| 2025        | 26     | 325   | 1,065 | 3,563 | 40   | 493   | 1,477 | 4,359 |
| 2026        | 26     | 322   | 1,055 | 3,531 | 40   | 488   | 1,464 | 4,320 |
| 2027        | 26     | 320   | 1,046 | 3,499 | 39   | 484   | 1,450 | 4,281 |
| 2028        | 25     | 317   | 1,037 | 3,468 | 39   | 479   | 1,438 | 4,243 |
| 2029        | 25     | 314   | 1,027 | 3,437 | 39   | 475   | 1,425 | 4,205 |
| 2030        | 25     | 311   | 1,018 | 3,406 | 38   | 471   | 1,412 | 4,168 |

Table S3.3: In-patient HF population estimates and projection in Canada, 2004- 2030

| Fiscal Year | Canadian population estimates and projection | Number of patients hospitalized with HF |                    |                    |
|-------------|----------------------------------------------|-----------------------------------------|--------------------|--------------------|
|             |                                              | Expected                                | 95% CI lower bound | 95% CI upper bound |
| 2004        | 31,938,004                                   | 116,773                                 | 114,443            | 119,076            |
| 2005        | 32,242,364                                   | 114,542                                 | 112,455            | 116,594            |
| 2006        | 32,570,505                                   | 112,700                                 | 110,749            | 114,613            |
| 2007        | 32,887,928                                   | 110,776                                 | 108,871            | 112,642            |
| 2008        | 33,245,773                                   | 110,985                                 | 109,133            | 112,798            |
| 2009        | 33,628,571                                   | 111,196                                 | 109,318            | 113,036            |
| 2010        | 34,005,274                                   | 112,971                                 | 111,064            | 114,837            |
| 2011        | 34,342,780                                   | 115,132                                 | 113,155            | 117,069            |
| 2012        | 34,752,128                                   | 117,613                                 | 115,497            | 119,693            |
| 2013        | 35,154,279                                   | 120,134                                 | 117,818            | 122,417            |
| 2014        | 35,515,400                                   | 122,293                                 | 119,734            | 124,827            |
| 2015        | 35,872,400                                   | 124,569                                 | 121,722            | 127,402            |
| 2016        | 36,229,100                                   | 126,968                                 | 123,792            | 130,143            |
| 2017        | 36,584,200                                   | 129,718                                 | 126,173            | 133,278            |
| 2018        | 36,939,900                                   | 132,506                                 | 128,561            | 136,486            |
| 2019        | 37,294,400                                   | 135,282                                 | 130,911            | 139,710            |
| 2020        | 37,646,400                                   | 138,083                                 | 133,261            | 142,989            |
| 2021        | 37,997,700                                   | 141,094                                 | 135,791            | 146,513            |
| 2022        | 38,345,800                                   | 144,139                                 | 138,330            | 150,098            |
| 2023        | 38,693,200                                   | 147,518                                 | 141,166            | 154,058            |
| 2024        | 39,039,800                                   | 151,065                                 | 144,141            | 158,222            |
| 2025        | 39,383,200                                   | 154,616                                 | 147,097            | 162,417            |
| 2026        | 39,724,100                                   | 158,346                                 | 150,198            | 166,830            |
| 2027        | 40,062,100                                   | 162,894                                 | 154,048            | 172,140            |
| 2028        | 40,395,000                                   | 167,202                                 | 157,644            | 177,227            |
| 2029        | 40,723,200                                   | 171,245                                 | 160,967            | 182,065            |
| 2030        | 41,046,600                                   | 175,201                                 | 164,185            | 186,838            |

**Estimates and projection of annual hospitalization costs per patient with HF from 2004- 2030**

Results of the generalized linear model to estimate annual hospitalization costs per patient with HF are summarized in Table S3.4. Annual hospitalization costs per patient with HF are shown in Table S3.5. Total HF associated hospitalization cost estimates and projection are presented in Table S3.6.

Table S3.4: Results of the generalized linear model to estimate annual costs per patient with HF hospitalized

| Variable                                                       | Parameter estimate | 95% CI         | p-value |
|----------------------------------------------------------------|--------------------|----------------|---------|
| Fiscal year                                                    | 0.013              | 0.010, 0.015   | <0.001  |
| Sex                                                            |                    |                |         |
| Male                                                           | 0.069              | 0.063, 0.075   | <0.001  |
| Female (ref)                                                   |                    |                | --      |
| Age group                                                      |                    |                |         |
| <60 years (ref)                                                | --                 | --             | --      |
| 60-69 years                                                    | -0.024             | -0.039, -0.009 | 0.002   |
| 70-79 years                                                    | -0.079             | -0.093, -0.065 | <0.001  |
| >=80 years                                                     | -0.209             | -0.222, -0.196 | <0.001  |
| Intercept= -16.017; gamma distribution and log link were used. |                    |                |         |

Table S3.5: Annual hospitalization cost per patient with HF by sex and age in Canada (in 2014 \$-values), 2004- 2030

| Fiscal Year | Patient average | Female |        |        |        | Male   |        |        |        |
|-------------|-----------------|--------|--------|--------|--------|--------|--------|--------|--------|
|             |                 | <60    | 60-69  | 70-79  | >=80   | <60    | 60-69  | 70-79  | >=80   |
| 2004        | 12,302          | 12,800 | 12,498 | 11,824 | 10,388 | 13,714 | 13,391 | 12,668 | 11,130 |
| 2005        | 12,459          | 12,963 | 12,658 | 11,975 | 10,521 | 13,889 | 13,563 | 12,831 | 11,272 |
| 2006        | 12,618          | 13,129 | 12,820 | 12,128 | 10,655 | 14,067 | 13,736 | 12,995 | 11,416 |
| 2007        | 12,780          | 13,297 | 12,984 | 12,284 | 10,792 | 14,247 | 13,912 | 13,161 | 11,562 |
| 2008        | 12,943          | 13,467 | 13,150 | 12,441 | 10,930 | 14,429 | 14,090 | 13,329 | 11,710 |
| 2009        | 13,109          | 13,640 | 13,319 | 12,600 | 11,069 | 14,614 | 14,270 | 13,500 | 11,860 |
| 2010        | 13,277          | 13,814 | 13,489 | 12,761 | 11,211 | 14,801 | 14,453 | 13,673 | 12,012 |
| 2011        | 13,446          | 13,991 | 13,662 | 12,924 | 11,355 | 14,990 | 14,637 | 13,847 | 12,166 |
| 2012        | 13,618          | 14,170 | 13,836 | 13,090 | 11,500 | 15,182 | 14,825 | 14,025 | 12,321 |
| 2013        | 13,793          | 14,351 | 14,013 | 13,257 | 11,647 | 15,376 | 15,014 | 14,204 | 12,479 |
| 2014        | 13,969          | 14,535 | 14,193 | 13,427 | 11,796 | 15,573 | 15,206 | 14,386 | 12,638 |
| 2015        | 14,148          | 14,721 | 14,374 | 13,598 | 11,947 | 15,772 | 15,401 | 14,570 | 12,800 |
| 2016        | 14,329          | 14,909 | 14,558 | 13,772 | 12,100 | 15,974 | 15,598 | 14,756 | 12,964 |
| 2017        | 14,512          | 15,100 | 14,744 | 13,949 | 12,254 | 16,178 | 15,797 | 14,945 | 13,130 |
| 2018        | 14,698          | 15,293 | 14,933 | 14,127 | 12,411 | 16,385 | 16,000 | 15,136 | 13,298 |
| 2019        | 14,886          | 15,488 | 15,124 | 14,308 | 12,570 | 16,595 | 16,204 | 15,330 | 13,468 |
| 2020        | 15,076          | 15,687 | 15,317 | 14,491 | 12,731 | 16,807 | 16,412 | 15,526 | 13,640 |
| 2021        | 15,269          | 15,887 | 15,513 | 14,676 | 12,894 | 17,022 | 16,622 | 15,724 | 13,815 |
| 2022        | 15,464          | 16,090 | 15,712 | 14,864 | 13,059 | 17,240 | 16,834 | 15,926 | 13,991 |
| 2023        | 15,662          | 16,296 | 15,913 | 15,054 | 13,226 | 17,460 | 17,050 | 16,129 | 14,170 |
| 2024        | 15,863          | 16,505 | 16,116 | 15,247 | 13,395 | 17,684 | 17,268 | 16,336 | 14,352 |
| 2025        | 16,066          | 16,716 | 16,323 | 15,442 | 13,566 | 17,910 | 17,489 | 16,545 | 14,535 |
| 2026        | 16,271          | 16,930 | 16,531 | 15,639 | 13,740 | 18,139 | 17,712 | 16,756 | 14,721 |
| 2027        | 16,479          | 17,146 | 16,743 | 15,839 | 13,916 | 18,371 | 17,939 | 16,971 | 14,909 |
| 2028        | 16,690          | 17,366 | 16,957 | 16,042 | 14,094 | 18,606 | 18,168 | 17,188 | 15,100 |
| 2029        | 16,904          | 17,588 | 17,174 | 16,247 | 14,274 | 18,844 | 18,401 | 17,408 | 15,293 |
| 2030        | 17,120          | 17,813 | 17,394 | 16,455 | 14,456 | 19,085 | 18,636 | 17,630 | 15,489 |

Table S3.6: HF associated hospitalization cost estimates and projection in Canada (in million, 2014 \$-values), 2004- 2030

| Fiscal Year | Total HF associated hospitalization costs |                    |                    |
|-------------|-------------------------------------------|--------------------|--------------------|
|             | Expected                                  | 95% CI lower bound | 95% CI upper bound |
| 2004        | 1,370                                     | 1,342              | 1,397              |
| 2005        | 1,360                                     | 1,335              | 1,384              |
| 2006        | 1,354                                     | 1,331              | 1,377              |
| 2007        | 1,348                                     | 1,325              | 1,371              |
| 2008        | 1,367                                     | 1,344              | 1,389              |
| 2009        | 1,385                                     | 1,361              | 1,408              |
| 2010        | 1,424                                     | 1,400              | 1,448              |
| 2011        | 1,469                                     | 1,444              | 1,494              |
| 2012        | 1,520                                     | 1,493              | 1,547              |
| 2013        | 1,572                                     | 1,542              | 1,602              |
| 2014        | 1,622                                     | 1,588              | 1,655              |
| 2015        | 1,673                                     | 1,635              | 1,711              |
| 2016        | 1,728                                     | 1,685              | 1,771              |
| 2017        | 1,789                                     | 1,740              | 1,838              |
| 2018        | 1,851                                     | 1,796              | 1,907              |
| 2019        | 1,914                                     | 1,853              | 1,977              |
| 2020        | 1,979                                     | 1,910              | 2,049              |
| 2021        | 2,048                                     | 1,971              | 2,126              |
| 2022        | 2,118                                     | 2,033              | 2,206              |
| 2023        | 2,195                                     | 2,100              | 2,292              |
| 2024        | 2,275                                     | 2,171              | 2,382              |
| 2025        | 2,356                                     | 2,242              | 2,475              |
| 2026        | 2,441                                     | 2,316              | 2,572              |
| 2027        | 2,539                                     | 2,401              | 2,683              |
| 2028        | 2,635                                     | 2,485              | 2,793              |
| 2029        | 2,729                                     | 2,566              | 2,901              |
| 2030        | 2,824                                     | 2,647              | 3,011              |
