# Supplementary material
Source: PubMed Central journal article supplement (PMC5047807)
Supplement: supp_4.3.E365_2015-0130_Original_submission.pdf [file supp_4.3.E365_2015-0130_Original_submission.pdf]

## The Current and Future Burden of Heart Failure Hospitalization Costs in Canada

Dat T. Tran, MPH<sup>1</sup>; Arto Ohinmaa, PhD<sup>1,2</sup>; Nguyen X. Thanh, MD PhD<sup>1,2</sup>; Jonathan G. Howlett, MD<sup>3</sup>; Justin A. Ezekowitz, MBBCh MSc<sup>4,5</sup>; Finlay A. McAlister, PhD<sup>4,5</sup>; Padma Kaul, PhD<sup>4,5</sup> from <sup>1</sup>School of Public Health, University of Alberta, Edmonton, Alberta; <sup>2</sup>Institute of Health Economics, Edmonton, Alberta; <sup>3</sup>Department of Medicine, University of Calgary, Calgary, Alberta; <sup>4</sup>Department of Medicine, University of Alberta, Edmonton, Alberta; and <sup>5</sup>Canadian VIGOUR Centre, University of Alberta, Edmonton.

**Running head: Hospitalization Costs of Heart Failure in Canada**

**Word count: 2,429**

**Corresponding author: Padma Kaul**

**2-132 Li Ka Shing Centre**

**University of Alberta**

**Tel: 780.492.1140**

**Email: [pkaul@ualberta.ca](mailto:pkaul@ualberta.ca)**

## Abstract

**Background:** We examined heart failure (HF) hospitalization costs between fiscal years (FY) 2004 and 2013 in Canada and modeled the future hospitalization costs until 2030.

**Methods:** Canadian Institutes for Health Information (CIHI) Discharge Abstract Database was used to identify hospitalizations with HF as the primary diagnosis between FY 2004-2013. Multiple linear regression models were used to calculate the trend in prevalence and extrapolate these to 2030. CIHI patient cost estimates were used to identify HF hospitalization costs. Generalized linear models were used to estimate average annual hospitalization costs per HF patient. We conducted a sensitivity analysis including all hospitalizations with HF in any diagnostic field.

**Results:** In 2013, 45,600 (95% CI: 43,800 to 47,200) patients were hospitalized with HF as the primary diagnosis, accounting for \$482 (95% CI: \$464 to \$500) million. By 2030, we estimate 54,000 (95% CI: 49,000 to 60,000) patients and hospitalization costs of \$722 million (95% CI: \$650 to \$801 million), with the very elderly (age  $\geq$  80 years) accounting for 52% of costs. Including hospitalizations where HF was a secondary diagnosis would increase the total HF hospitalization cost to \$2,800 (95% CI: \$2,600 to \$3,000) million in 2030.

**Interpretation:** As with other developed countries, hospital costs related to HF are on the rise in Canada. The elderly are the main consumers of HF hospital services.

Strategies to improve outpatient care to reduce HF hospitalization rates are needed.

## Introduction

Heart Failure (HF) is a costly health condition and a major public health problem. It is estimated that 2-3% of the population in developed countries has HF and the prevalence increases to 8% among those aged more than 75 years [1]. HF is the single most common reason for hospital admission [2, 3]. In the United States, it was projected that there would be 8.5 million people (3% of the U.S. population) with HF in 2030, which would cost the U.S. health system \$53 billion [4].

It has been hypothesized that a combination of improved survival in HF patients [5-7] and population ageing [8] is expected to increase the burden of HF in Canada.

However, little is known on the current and future cost burden of HF on the Canadian health care system. Accordingly, the objectives of our study were to examine HF hospitalization costs between fiscal years (FY) 2004 and 2013 in Canada, and based on these, model the future prevalence and hospitalization costs until 2030.

## Methods

### *Annual volume of HF patients from FY 2004 - 2013*

The Canadian Institute for Health Information (CIHI) Hospital Discharge Abstract Dataset (DAD) from FY 2004 to 2013 for all Canadian provinces and territories except Quebec was used to identify hospitalizations with a primary diagnosis of HF (10<sup>th</sup> revision International Classification of Disease code of I50).

1  
2  
3 Canadian population estimates from Statistics Canada Tables CANSIM-051-0001 for  
4  
5 FY 2004 to 2013 [9] (minus Quebec) were used as denominators to calculate annual HF  
6  
7 hospitalization prevalence rates per 100,000 population for each of the following groups  
8  
9 of males and females: age less than 60 years, 60-69 years, 70-79 years, and 80 years  
10  
11 or greater. Patients with multiple HF hospitalizations during the same year were counted  
12  
13 only once.  
14  
15  
16

17  
18 As previously mentioned, HF hospitalization data for the province of Quebec were not  
19  
20 available. To estimate the burden of HF for the entire country, we assumed the HF  
21  
22 hospitalization prevalence rates in Quebec to be the average across all other provinces  
23  
24 and territories for which data were available. In order to do this, we first used Joinpoint  
25  
26 regression to detect significant changes in annual hospitalization prevalence rates  
27  
28 between FY 2004 - 2013 [5, 10, 11]. Significance testing was performed using Monte  
29  
30 Carlo permutation method with 4,500 permutations [12]. Significant turning points at  
31  
32  $\alpha=0.05$  were recorded and used as a knot in a multiple linear regression (MLR) model to  
33  
34 predict hospitalization prevalence rates for the entire country except Quebec. The MLR  
35  
36 model's outcome variable was the natural logarithm of HF hospitalization prevalence  
37  
38 rate and predictors were FY, patient sex, age group, the knot, and the interaction  
39  
40 between sex and age. Model assumptions (homoscedasticity, normality of residuals,  
41  
42 and the linearity of relationships between the outcome and FY as a continuous  
43  
44 predictor) were checked and explored for unusual and influential observations by  
45  
46 examining residuals and leverage values. The estimated number of HF patients, along  
47  
48 with 95% confidence intervals (CI), was derived by multiplying the estimated HF  
49  
50  
51  
52  
53  
54  
55  
56  
57  
58  
59  
60

1  
2  
3 hospitalization prevalence rate from the MLR model with the Canadian population  
4  
5 (including Quebec) for each age/sex group for each year.  
6  
7

### 8 9 ***Annual hospitalization costs per HF patient from FY 2004 - 2013***

10  
11  
12 The cost of each HF hospitalization was obtained from the CIHI patient cost estimates  
13 (PCE). The CIHI PCE uses an algorithm, taking case mixed groups (CMG), resource  
14 intensity weight, cost per weighted case, and length of stay into consideration [13]. PCE  
15 for each FY, CMG and age group combination were only available for FY 2009 to 2012.  
16  
17 If the cost for a certain CMG grouper was not available in the CIHI PCE, we used the  
18 cost in FY 2010 for that grouper in the Cost Analysis Tool of the Ontario Case Costing  
19 Initiative [14]. All costs were then converted to 2014 dollar using Bank of Canada  
20 inflation calculator [15]. Annual in-patient costs for a HF patient were derived by  
21 summing up costs of individual hospital admissions of the same patient in the same  
22 year. We then fitted a generalized linear model (GLM) with gamma distribution and log  
23 link to estimate average annual hospitalization costs per HF patient for the entire study  
24 period (FY 2004- 2013). The variables included in the model were FY, patient sex, and  
25 age group as other patient factors were already incorporated into the CIHI PCE  
26 algorithm (described above).  
27  
28  
29  
30  
31  
32  
33  
34  
35  
36  
37  
38  
39  
40  
41  
42  
43  
44  
45

46  
47 The annual total HF hospitalization costs in Canada from FY 2004 to 2013 were derived  
48 by multiplying the estimated number of HF patients hospitalized with the annual hospital  
49 cost per HF patient.  
50  
51  
52  
53  
54

### 55 ***Projection of HF prevalence and costs from FY 2014 to 2030***

1  
2  
3 We assumed that the trend of HF hospitalizations observed during FY 2004- 2013  
4  
5 would continue. The coefficients from the MLR and GLM models described above were  
6  
7 used to predict expected HF hospitalization prevalence rates and hospitalization costs  
8  
9 per HF patient for each year for the FY 2014- 2030 period, respectively. We used  
10  
11 Canadian population estimates (medium population growth- M5) from 2014 to 2030 [8]  
12  
13 to calculate expected number of HF patients for each year. The annual total HF  
14  
15 hospitalization costs for the 2014- 2030 period were derived by multiplying expected  
16  
17 number of HF patients hospitalized with the annual hospitalization cost per patient.  
18  
19  
20  
21  
22

### 23 ***Sensitivity analysis***

24  
25  
26  
27 We conducted three sensitivity analyses. First, we examined the uncertainty around our  
28  
29 annual HF hospitalization cost estimates by varying the estimated average annual  
30  
31 hospitalization cost per patient within its 95% CI. Second, we added low and high  
32  
33 population growth scenarios [8] into projections of HF hospitalization prevalence and  
34  
35 costs from 2014 to 2030. Third, and most important, we re-calculated prevalence and  
36  
37 cost estimates based on hospitalizations in which HF was coded as either primary or  
38  
39 secondary diagnosis. Our primary analysis is based on hospitalizations where HF was  
40  
41 coded as the primary diagnosis. However, HF has been shown to be associated with  
42  
43 other conditions such as acute coronary syndromes and renal disease. It is therefore  
44  
45 possible that when HF is present as a secondary diagnosis, it could contribute to  
46  
47 hospital costs.  
48  
49  
50  
51  
52  
53  
54  
55  
56  
57  
58  
59  
60

## Results

### ***Characteristics of studied population***

Between FY 2004 and 2013, there were 421,121 hospitalizations with a primary diagnosis of HF in Canada, excluding Quebec (Table 1). Average expected length of stay for an admission increased from 7.5 days in FY 2004 to 8.3 days in FY 2013. However, the median acute length of stay remained stable at 6 days. The numbers of hospitalizations and patients both reached the lowest point in 2007 and then increased. Females outnumbered males in the first 3 years. Patient average age increased overtime, as did the proportion of patients over the age of 80 years. Diabetes, chronic obstructive pulmonary and renal diseases were the most common comorbidities among HF patients. The largest increase in comorbidity rate was for diabetes, which increased from 29.3% in 2004 to 45.7% in 2013. Proportion of patients with more than one hospitalization with HF as the primary diagnosis per year increased from 17.9% in 2004 to 18.8% in 2013.

### ***Annual volume of HF patients from FY 2004 - 2013***

The results of the MLR model to estimate the hospitalization prevalence rate of HF overtime for each age and sex group are shown in Appendix 1. The HF hospitalization prevalence rates declined overtime in all groups (Figure 1). The prevalence rates were more than 100 times higher in the oldest compared to the youngest groups in both sexes. HF hospitalizations were more prevalent in males in all age groups.

1  
2  
3 In contrast to the declining trend of the hospitalization prevalence rates, the absolute  
4 number of HF patients hospitalized increased over time. There were 34,311 patients  
5 hospitalized with HF in 2004 and this number increased to 36,142 in 2013 (Table 1).  
6  
7  
8 Extrapolating to include Quebec, we estimated 44,400 patients (95% CI: 42,500 to  
9  
10  
11  
12  
13  
14  
15  
16  
17  
18  
19  
20  
21  
22  
23  
24  
25  
26  
27  
28  
29  
30  
31  
32  
33  
34  
35  
36  
37  
38  
39  
40  
41  
42  
43  
44  
45  
46  
47  
48  
49  
50  
51  
52  
53  
54  
55  
56  
57  
58  
59  
60

### ***Annual hospitalization costs per HF patient from FY 2004 - 2013***

Results of the GLM model to estimate annual HF hospitalization cost per patient are presented in the Appendix 1. Hospitalization costs for a HF patient increased by 1.4% annually. Annual hospitalization costs were higher for men and for younger patients. The average hospitalization costs for a HF patient in 2004 and 2013 were estimated at \$9,700 and \$11,000, respectively (Table 2).

Total HF hospitalization costs from 2004 to 2013 increased gradually (Figure 2). Using \$2014 values, the total cost was \$415 million (95% CI: \$397 to \$432 million) in 2004 and \$482 million (95% CI: \$464 to \$500 million) in 2013. In 2013, the very elderly (age  $\geq$  80 years) accounted for 48.1% of costs while patients aged 70-79 years, 60-69 years, and < 60 years accounted for 27%, 16.2% and 8.7% of total HF costs, respectively.

### ***Projection of HF prevalence and costs from FY 2014 to 2030***

Results of HF hospitalization cost projection until 2030 are presented in Appendix 2. We estimated 48,000 (95% CI: 45,000 to 51,000 patients) and 54,000 HF patients (95% CI:



1  
2  
3 49,000 to 60,000 patients) in 2020 and 2030, respectively. Annual hospitalization costs  
4  
5 per HF patient were projected to increase to \$12,000 and \$14,000 in 2020 and 2030,  
6  
7 respectively. Total HF hospitalization costs were projected to increase to \$722 million  
8  
9 (95% CI: \$650 to \$801 million) in 2030 (Figure 2). This reflects a 49.8% increase from  
10  
11 2013 to 2030. The very elderly (age  $\geq$  80 years) was projected to account for 52% of  
12  
13 total costs in 2030.  
14  
15

### 16 17 18 **Sensitivity analyses** 19

20  
21 Varying annual hospitalization cost per HF patient within its 95% CI led to a maximum  
22  
23 deviation of 1% of total HF hospitalization costs in 2013. The deviation increased to  
24  
25 5.8% in 2030. This translated to a range of total HF hospitalization costs from \$477 to  
26  
27 \$487 million and from \$681 to \$764 million in 2013 and 2030, respectively.  
28  
29

30  
31 Compared to medium population growth, low population growth resulted in 1,500 fewer  
32  
33 HF patients and high population growth scenario resulted in an additional 2,500 HF  
34  
35 patients in 2030. Consequently, the low population growth scenario would be  
36  
37 associated with a \$22 million reduction and the high population growth scenario would  
38  
39 be associated with an additional \$33 million in HF hospitalization costs.  
40  
41  
42  
43  
44  
45

46 Results of prevalence and cost estimates based on hospitalizations with HF as either  
47  
48 the primary or secondary diagnosis are provided in Appendix 3. Extending the analyses  
49  
50 to include hospitalizations with HF in a secondary diagnosis field more than tripled  
51  
52 (n=175,000 (95% CI: 164,000 to 187,000)) the estimate of patients hospitalized with HF  
53  
54  
55  
56  
57  
58  
59  
60

1  
2  
3 in the year 2030. Consequently, total HF associated hospitalization costs were  
4  
5 projected to be \$2,800 (95% CI: \$2,600 to \$3,000) million in 2030.  
6  
7

## 8 9 **Interpretation**

10  
11  
12  
13 Patients who were hospitalized with a primary diagnosis of HF cost the Canadian health  
14  
15 care system \$415 million in 2004 and \$482 million in 2013. HF hospitalizations  
16  
17 therefore accounted for 0.8% of hospital spending in 2013 [16]. We estimate that cost of  
18  
19 hospitalizations with HF as the primary diagnosis will increase substantially by 2030 to  
20  
21 approximately \$720 million (50% increase from 2013), assuming the current patterns  
22  
23 continues. The very elderly (age > 80 years) are the largest consumers of HF hospital  
24  
25 services. Including hospitalizations where HF is a secondary diagnosis increased the  
26  
27 cost estimate to 2.8 billion by 2030.  
28  
29  
30  
31  
32

33  
34 Although there is a declining trend in the in-patient prevalence rates in both sexes, the  
35  
36 absolute number of HF patients hospitalized is increasing. This is largely due to the  
37  
38 change in population demographics. Statistics Canada has projected marked increases  
39  
40 in the oldest age groups where HF is most prevalent: the proportion of people aged 80  
41  
42 years and over is expected to rise by 73% in the next 15 years from 1.1 million people  
43  
44 (4.1% of total population) in 2015 to 1.9 million (6.1% of total population) in 2030 [8].  
45  
46

47  
48 Our estimate of the increasing trend in the absolute hospitalized HF patient count is  
49  
50 more conservative than that reported previously [17]. This is probably because we  
51  
52 focused on hospitalizations with a primary diagnosis of HF. Extending the analysis to  
53  
54 include hospitalization to include hospitalizations where HF was coded as a secondary  
55  
56

1  
2  
3 diagnosis more than tripled our estimates of the number of patients hospitalized with  
4 HF. Furthermore, we used more recent data (of 10 consecutive years up to 2013) and  
5  
6 thus were able to take into account the slightly decreasing trends in hospitalization  
7  
8 prevalence in all age groups, while the previous study by Johansen et al. used only a  
9  
10 single data point of FY 1996/1997 [17].  
11  
12  
13  
14  
15

16 We projected that a patients hospitalized with a primary diagnosis of HF would cost the  
17  
18 health care system \$14,000 per year in 2030. This is higher than the average cost of  
19  
20 \$8,200 in the United States (converted to 2014 Canadian dollar assuming  
21  
22 hospitalization accounts for 80% of medical costs [4] and 80% of patients with HF are  
23  
24 hospitalized [18]). This could be explained by the fact that we used CMG, which takes  
25  
26 comorbidities into consideration, while the U.S. study modeled medical costs  
27  
28 attributable to HF only. Furthermore, patterns of care may also account for the  
29  
30 difference in cost estimates in the two countries. We have previously shown that HF  
31  
32 patients in Canada have lengths of stays that are longer than their U.S. counterparts  
33  
34 [19].  
35  
36  
37  
38  
39  
40

41 Some limitations of our study should be mentioned. We assumed that the trend in HF  
42  
43 hospitalization patterns observed during FY 2004- 2013 would continue. Long-term HF  
44  
45 prevalence and costs in Canada may change as a result of new therapies or changes in  
46  
47 HF management strategies. However, forecasts based on current trends can serve as  
48  
49 useful benchmarks to examine the impact of future innovations on health care costs.  
50  
51 Second, we did not have hospitalization data from Quebec and assumed HF  
52  
53 hospitalization prevalence rates in the province to be the average across all other  
54  
55  
56  
57  
58  
59  
60

1  
2  
3 provinces and territories. Finally, this study solely evaluated HF hospitalization costs  
4  
5 and did not include physician, outpatient and drug costs, which are of increasing  
6  
7 importance [20]. However, approximately 80% of total HF medical costs can be  
8  
9 attributed to hospitalization costs [4, 21].  
10  
11

12  
13  
14 As with other developed countries, the hospital resources related to HF care are on the  
15  
16 rise in Canada. Hospitalizations where HF is the primary diagnosis cost the nation \$482  
17  
18 million in 2013 and these costs will increase to \$720 million by 2030. Including costs  
19  
20 where HF is the secondary diagnosis in our estimates increased the total cost to a  
21  
22 sobering 2.8 billion by 2030. The elderly are the main consumers of HF hospital  
23  
24 services. Strategies to improve outpatient care to reduce HF hospitalization rates are  
25  
26 needed, as are innovations that provide seamless, cost-effective and evidence-based  
27  
28 interventions from the emergency department through discharge.  
29  
30  
31  
32  
33  
34  
35  
36  
37  
38  
39  
40  
41  
42  
43  
44  
45  
46  
47  
48  
49  
50  
51  
52  
53  
54  
55  
56  
57  
58  
59  
60

## References

1. Bui, A.L., T.B. Horwich, and G.C. Fonarow, *Epidemiology and risk profile of heart failure*. *Nat Rev Cardiol*, 2011. **8**(1): p. 30-41.
2. Neumann, T., et al., *Heart failure: the commonest reason for hospital admission in Germany: medical and economic perspectives*. *Dtsch Arztebl Int*, 2009. **106**(16): p. 269-75.
3. Ross, H., et al., *Treating the right patient at the right time: access to heart failure care*. *Can J Cardiol*, 2006. **22**(9): p. 749-54.
4. Heidenreich, P.A., et al., *Forecasting the impact of heart failure in the United States: a policy statement from the American Heart Association*. *Circ Heart Fail*, 2013. **6**(3): p. 606-19.
5. Jhund, P.S., et al., *Long-term trends in first hospitalization for heart failure and subsequent survival between 1986 and 2003: a population study of 5.1 million people*. *Circulation*, 2009. **119**(4): p. 515-23.
6. Yeung, D.F., et al., *Trends in the incidence and outcomes of heart failure in Ontario, Canada: 1997 to 2007*. *CMAJ*, 2012. **184**(14): p. E765-73.
7. Tu, J.V., et al., *National trends in rates of death and hospital admissions related to acute myocardial infarction, heart failure and stroke, 1994-2004*. *CMAJ*, 2009. **180**(13): p. E118-25.
8. Statistics Canada. *Table 052-0005 - Estimates of population, by age group and sex for July 1, Canada, provinces and territories*. CANSIM (database) [cited 2015 February 28]; Available from: <http://www5.statcan.gc.ca/cansim/pick-choisir?lang=eng&p2=33&id=0520005>.
9. Statistics Canada. *Table 051-0001 - Estimates of population, by age group and sex for July 1, Canada, provinces and territories*. CANSIM (database) [cited 2015 February 28]; Available from: <http://www5.statcan.gc.ca/cansim/pick-choisir?lang=eng&p2=33&id=0510001>.
10. Statistical Methodology and Applications Branch, *Joinpoint Regression Program, Version 4.1.1.4 - February 2015*. Surveillance Research Program, National Cancer Institute.
11. Pham, T.M., et al., *Premature mortality due to stroke and trend in stroke mortality in Japan (1980-2005)*. *Eur J Public Health*, 2011. **21**(5): p. 609-12.
12. Kim, H.J., et al., *Permutation tests for joinpoint regression with applications to cancer rates*. *Stat Med*, 2000. **19**(3): p. 335-51.

- 1
  - 2
  - 3
  - 4
  - 5
  - 6
  - 7
  - 8
  - 9
  - 10
  - 11
  - 12
  - 13
  - 14
  - 15
  - 16
  - 17
  - 18
  - 19
  - 20
  - 21
  - 22
  - 23
  - 24
  - 25
  - 26
  - 27
  - 28
  - 29
  - 30
  - 31
  - 32
  - 33
  - 34
  - 35
  - 36
  - 37
  - 38
  - 39
  - 40
  - 41
  - 42
  - 43
  - 44
  - 45
  - 46
  - 47
  - 48
  - 49
  - 50
  - 51
  - 52
  - 53
  - 54
  - 55
  - 56
  - 57
  - 58
  - 59
  - 60
13. Canadian Institute for Health Information. *Patient Cost Estimator*. [cited 2015 February 26]; Available from: <http://www.cihi.ca/pce>.
14. Ontario Case Costing Initiative. *Cost Analysis Tool*. April 2013 [cited 2015 February 20]; Available from: <https://hsimi.ca/occp/occpreports/>.
15. Bank of Canada. *Inflation Calculator*. [cited 2015 May 15th]; Available from: [http://www.bankofcanada.ca/rates/related/inflation-calculator/?page\\_moved=1](http://www.bankofcanada.ca/rates/related/inflation-calculator/?page_moved=1).
16. Canadian Institute for Health Information, *National Health Expenditure Trends, 1975 to 2014*. 2014.
17. Johansen, H., et al., *On the rise: The current and projected future burden of congestive heart failure hospitalization in Canada*. Can J Cardiol, 2003. **19**(4): p. 430-5.
18. Unroe, K.T., et al., *Resource use in the last 6 months of life among medicare beneficiaries with heart failure, 2000-2007*. Arch Intern Med, 2011. **171**(3): p. 196-203.
19. Kaul, P., et al., *Differences in treatment, outcomes, and quality of life among patients with heart failure in Canada and the United States*. JACC Heart Fail, 2013. **1**(6): p. 523-30.
20. Ezekowitz, J.A., et al., *Trends in heart failure care: has the incident diagnosis of heart failure shifted from the hospital to the emergency department and outpatient clinics?* Eur J Heart Fail, 2011. **13**(2): p. 142-7.
21. Dunlay, S.M., et al., *Lifetime costs of medical care after heart failure diagnosis*. Circ Cardiovasc Qual Outcomes, 2011. **4**(1): p. 68-75.

## Figure legends

Figure 1: HF hospitalization prevalence rates in Canada, 2004-2013

Figure 2: HF hospitalization cost estimates and projection in Canada from 2004-2013 and 2014-2030 with 95% confidence intervals (in 2014 \$-values)

Confidential

Table 1: Statistics of HF patients hospitalized from 2004- 2013 (excluding Quebec)

| Variable<br>N (%)                            | 2004           | 2005           | 2006           | 2007           | 2008           | 2009           | 2010           | 2011           | 2012           | 2013           |
|----------------------------------------------|----------------|----------------|----------------|----------------|----------------|----------------|----------------|----------------|----------------|----------------|
| Hospitalizations                             | 43,102         | 42,039         | 41,033         | 40,390         | 40,899         | 41,084         | 41,585         | 42,298         | 43,163         | 45,528         |
| Average<br>ELOS (SD)                         | 7.5<br>(4.1)   | 7.5<br>(4.1)   | 7.7<br>(4.4)   | 7.8<br>(4.7)   | 7.9<br>(4.8)   | 8.0<br>(5.0)   | 8.1<br>(5.1)   | 8.3<br>(5.1)   | 8.4<br>(5.3)   | 8.3<br>(5.3)   |
| Median aLOS<br>(IQR)                         | 6 (3-11)       | 6 (3-11)       | 6 (3-11)       | 6 (3-11)       | 6 (3-11)       | 6 (3-11)       | 6 (3-11)       | 6 (3-11)       | 6 (3-11)       | 6 (3-11)       |
| Patients                                     | 34,311         | 33,600         | 32,876         | 32,542         | 33,004         | 32,995         | 33,144         | 33,753         | 34,365         | 36,142         |
| Male/female<br>ratio                         | 0.96           | 0.98           | 0.98           | 1.00           | 1.02           | 1.01           | 1.01           | 1.01           | 1.03           | 1.04           |
| Average age<br>(SD)                          | 76.8<br>(12.1) | 76.9<br>(12.4) | 77.1<br>(12.3) | 77.1<br>(12.5) | 77.2<br>(12.5) | 77.1<br>(12.7) | 77.6<br>(12.4) | 77.6<br>(12.5) | 77.8<br>(12.6) | 77.9<br>(12.7) |
| Patient<br>proportion by<br>age group (%) ** |                |                |                |                |                |                |                |                |                |                |
| <60 years                                    | 8.8            | 9.2            | 8.8            | 9.0            | 9.2            | 9.0            | 8.4            | 8.6            | 8.5            | 8.6            |
| 60-69 years                                  | 13.5           | 13.7           | 13.5           | 13.8           | 13.7           | 14.5           | 14.0           | 13.8           | 13.7           | 14.0           |
| 70-79 years                                  | 29.8           | 28.7           | 27.8           | 27.1           | 27.0           | 26.2           | 25.7           | 25.1           | 24.6           | 23.8           |
| >=80 years                                   | 47.8           | 48.4           | 50.0           | 50.1           | 50.2           | 50.3           | 51.9           | 52.5           | 53.2           | 53.6           |
| Patient<br>comorbidity (%)                   |                |                |                |                |                |                |                |                |                |                |
| AMI                                          | 11.7           | 11.7           | 12.0           | 11.9           | 12.7           | 11.6           | 11.6           | 11.1           | 10.5           | 9.6            |
| COPD                                         | 19.5           | 19.4           | 20.1           | 19.7           | 20.5           | 20.2           | 21.0           | 21.1           | 20.7           | 20.2           |
| Dementia                                     | 5.2            | 5.1            | 5.4            | 5.2            | 5.5            | 5.3            | 5.9            | 6.0            | 5.9            | 5.9            |
| Diabetes                                     | 29.3           | 30.4           | 40.0           | 40.9           | 40.6           | 45.0           | 44.7           | 44.9           | 45.5           | 45.7           |
| Renal                                        | 19.0           | 20.0           | 18.6           | 18.0           | 18.8           | 14.6           | 14.4           | 14.2           | 13.9           | 14.3           |
| Patient with >1<br>hospitalization<br>(%)    | 17.9           | 17.7           | 17.8           | 17.4           | 17.4           | 17.6           | 18.2           | 18.4           | 18.6           | 18.8           |

\*ELOS is expected length of stay, which is a number of days in hospital assigned to each admission based on CIHI grouping methodology.

aLOS: acute length of stay

\*\*Total percentage may not be exactly 100% because of rounding

AMI: Acute Myocardial Infarction

COPD: Chronic Obstructive Pulmonary Diseases



Table 2: Annual hospitalization cost for HF patients hospitalized (in 2014 \$-values)

| Group                    | 2004   | 2007   | 2010   | 2013   |
|--------------------------|--------|--------|--------|--------|
| Average cost per patient | 9,679  | 10,092 | 10,522 | 10,970 |
| Female                   |        |        |        |        |
| All ages                 | 9,543  | 9,950  | 10,374 | 10,816 |
| <60 years                | 10,044 | 10,472 | 10,918 | 11,383 |
| 60- 69 years             | 9,917  | 10,339 | 10,780 | 11,239 |
| 70- 79 years             | 9,498  | 9,903  | 10,325 | 10,765 |
| >=80 years               | 8,714  | 9,085  | 9,472  | 9,876  |
| Male                     |        |        |        |        |
| All ages                 | 9,816  | 10,234 | 10,670 | 11,125 |
| <60 years                | 10,331 | 10,771 | 11,230 | 11,709 |
| 60- 69 years             | 10,200 | 10,635 | 11,088 | 11,560 |
| 70- 79 years             | 9,770  | 10,186 | 10,620 | 11,073 |
| >=80 years               | 8,963  | 9,345  | 9,743  | 10,158 |

## Appendix 1: Detailed Results of HF Hospitalization Cost Evaluation in Canada, FY 2004- 2013

### Annual volume of HF patients from FY 2004- 2013

We could only examine one turning point in each of the 8 studied groups by Joinpoint regression because of limited number of observations. Five knots were statistically significant at  $\alpha=0.05$  at 2006 for female/70-79 and male/70-79, 2008 for female/60-69 and female/ $\geq 80$ , and at 2010 for male/ $\geq 80$  groups. Results of the MLR model to predict hospitalized prevalence rates are summarized in Table S1.1. Hospitalization prevalence rate from 2004 to 2013 are shown in detail in Table S1.2. In-patient HF population estimates from 2004 to 2013 are presented in detail in Table S1.3.

Table S1.1: Results of the MLR model to predict HF patient hospitalized prevalence rates

| Variable                                                                        | Parameter estimate | 95% CI         | p-value |
|---------------------------------------------------------------------------------|--------------------|----------------|---------|
| Fiscal year                                                                     | -0.033             | -0.043, -0.022 | <0.001  |
| Sex                                                                             |                    |                |         |
| Male                                                                            | 0.194              | 0.147, 0.241   | <0.001  |
| Female (ref)                                                                    | --                 | --             | --      |
| Age group                                                                       |                    |                |         |
| <60 years                                                                       | -5.061             | -5.108, -5.015 | <0.001  |
| 60-69 years                                                                     | -2.427             | -2.472, -2.382 | <0.001  |
| 70-79 years                                                                     | -1.215             | -1.261, -1.170 | <0.001  |
| $\geq 80$ years (ref)                                                           | --                 | --             | --      |
| Knot                                                                            | 0.012              | -0.001, 0.025  | 0.079   |
| Interaction                                                                     |                    |                |         |
| Sex/<60 years                                                                   | 0.347              | 0.283, 0.412   | <0.001  |
| Sex/60-69 years                                                                 | 0.327              | 0.258, 0.396   | <0.001  |
| Sex/70-79 years                                                                 | 0.183              | 0.118, 0.248   | <0.001  |
| Adjusted R-square=0.999; Intercept= 49.720; Model assumptions' check satisfied. |                    |                |         |

Table S1.2: HF hospitalization prevalence rate per 100,000 populations by sex and age in Canada, 2004- 2013

| Fiscal Year | Female |       |       |       | Male |       |       |       |
|-------------|--------|-------|-------|-------|------|-------|-------|-------|
|             | <60    | 60-69 | 70-79 | >=80  | <60  | 60-69 | 70-79 | >=80  |
| 2004        | 12     | 168   | 551   | 1,902 | 20   | 270   | 803   | 2,363 |
| 2005        | 11     | 163   | 533   | 1,841 | 19   | 264   | 778   | 2,287 |
| 2006        | 11     | 157   | 516   | 1,782 | 19   | 259   | 753   | 2,214 |
| 2007        | 11     | 152   | 506   | 1,725 | 19   | 253   | 737   | 2,142 |
| 2008        | 11     | 147   | 495   | 1,669 | 18   | 248   | 721   | 2,073 |
| 2009        | 10     | 144   | 485   | 1,634 | 18   | 243   | 706   | 2,007 |
| 2010        | 10     | 141   | 475   | 1,600 | 17   | 238   | 692   | 1,942 |
| 2011        | 10     | 138   | 465   | 1,567 | 17   | 233   | 677   | 1,902 |
| 2012        | 10     | 135   | 455   | 1,534 | 17   | 228   | 663   | 1,862 |
| 2013        | 10     | 133   | 445   | 1,502 | 16   | 223   | 649   | 1,823 |

Table S1.3: In-patient HF population estimates in Canada, 2004- 2013

| Fiscal Year | Number of HF patients hospitalized |                    |                    |
|-------------|------------------------------------|--------------------|--------------------|
|             | Estimated average                  | 95% CI lower bound | 95% CI upper bound |
| 2004        | 44,355                             | 42,446             | 46,235             |
| 2005        | 44,184                             | 42,492             | 45,827             |
| 2006        | 44,147                             | 42,583             | 45,653             |
| 2007        | 44,095                             | 42,618             | 45,509             |
| 2008        | 44,065                             | 42,582             | 45,485             |
| 2009        | 44,196                             | 42,709             | 45,620             |
| 2010        | 44,404                             | 42,859             | 45,889             |
| 2011        | 44,718                             | 43,141             | 46,235             |
| 2012        | 45,140                             | 43,499             | 46,725             |
| 2013        | 45,562                             | 43,830             | 47,244             |

### Annual hospitalization costs per HF patient from FY 2004 - 2013

168,130 HF hospitalizations representing 134,257 patients from 2009 to 2012 were matched with CIHI PCE data. Costs of 2% of hospitalizations (n=3,042, containing 7 CMGs) with no matching PCE data were derived from the Ontario Cost Analysis Tool. Results of the GLM model to predict annual hospitalization costs per a HF patient are summarized in Table S1.4. Annual hospitalization costs per a HF patient are shown in detail in Table S1.5. Total HF hospitalization cost estimates are presented in detail in Table S1.6.

Table S1.4: Results of the GLM model to predict annual costs per HF patient hospitalized

| Variable                                                       | Parameter estimate | 95% CI         | p-value |
|----------------------------------------------------------------|--------------------|----------------|---------|
| Fiscal year                                                    | 0.014              | 0.011, 0.017   | <0.001  |
| Sex                                                            |                    |                |         |
| Male                                                           | 0.028              | 0.022, 0.035   | <0.001  |
| Female (ref)                                                   | --                 | --             | --      |
| Age group                                                      |                    |                |         |
| <60 years (ref)                                                | --                 | --             | --      |
| 60-69 years                                                    | -0.013             | -0.032, -0.006 | 0.190   |
| 70-79 years                                                    | -0.056             | -0.074, -0.038 | <0.001  |
| >=80 years                                                     | -0.142             | -0.159, -0.125 | <0.001  |
| Intercept= -18.662; gamma distribution and log link were used. |                    |                |         |

Table S1.5: Annual hospitalization cost per a HF patient by sex and age in Canada (in 2014 \$-values), 2004- 2013

| Fiscal Year | Patient average | Female |        |        |       | Male   |        |        |        |
|-------------|-----------------|--------|--------|--------|-------|--------|--------|--------|--------|
|             |                 | <60    | 60-69  | 70-79  | >=80  | <60    | 60-69  | 70-79  | >=80   |
| 2004        | 9,679           | 10,044 | 9,917  | 9,498  | 8,714 | 10,331 | 10,200 | 9,770  | 8,963  |
| 2005        | 9,815           | 10,185 | 10,055 | 9,631  | 8,836 | 10,476 | 10,343 | 9,907  | 9,088  |
| 2006        | 9,952           | 10,327 | 10,196 | 9,766  | 8,959 | 10,622 | 10,488 | 10,045 | 9,215  |
| 2007        | 10,092          | 10,472 | 10,339 | 9,903  | 9,085 | 10,771 | 10,635 | 10,186 | 9,345  |
| 2008        | 10,233          | 10,619 | 10,484 | 10,042 | 9,212 | 10,922 | 10,784 | 10,329 | 9,475  |
| 2009        | 10,377          | 10,767 | 10,631 | 10,182 | 9,341 | 11,075 | 10,935 | 10,473 | 9,608  |
| 2010        | 10,522          | 10,918 | 10,780 | 10,325 | 9,472 | 11,230 | 11,088 | 10,620 | 9,743  |
| 2011        | 10,669          | 11,071 | 10,931 | 10,470 | 9,605 | 11,387 | 11,243 | 10,769 | 9,879  |
| 2012        | 10,819          | 11,226 | 11,084 | 10,616 | 9,739 | 11,547 | 11,401 | 10,920 | 10,018 |
| 2013        | 10,970          | 11,383 | 11,239 | 10,765 | 9,876 | 11,709 | 11,560 | 11,073 | 10,158 |

Table S1.6: Annual HF hospitalization cost estimates in Canada (in million, 2014 \$-values), 2004- 2013

| Fiscal Year | Total HF hospitalization costs |                    |                    |
|-------------|--------------------------------|--------------------|--------------------|
|             | Estimated average              | 95% CI lower bound | 95% CI upper bound |
| 2004        | 415                            | 397                | 432                |
| 2005        | 419                            | 403                | 434                |
| 2006        | 424                            | 409                | 438                |
| 2007        | 429                            | 415                | 443                |
| 2008        | 435                            | 421                | 449                |
| 2009        | 443                            | 428                | 457                |
| 2010        | 451                            | 435                | 466                |
| 2011        | 460                            | 444                | 476                |
| 2012        | 471                            | 454                | 488                |
| 2013        | 482                            | 464                | 500                |

## Appendix 2: Detailed Results of HF Hospitalization Cost Projection in Canada, FY 2014- 2030

### *Projection of annual volume of HF patients from FY 2014- 2030*

Expected HF hospitalization prevalence rate from 2014 to 2030 are shown in detail in Table S2.1. Annual in-patient HF population projections from 2014 to 2030 are presented in detail in Table S2.2

Table S2.1: HF hospitalization prevalence rate per 100,000 populations by sex and age in Canada, 2014- 2030

| Fiscal Year | Female |       |       |       | Male |       |       |       |
|-------------|--------|-------|-------|-------|------|-------|-------|-------|
|             | <60    | 60-69 | 70-79 | >=80  | <60  | 60-69 | 70-79 | >=80  |
| 2014        | 9      | 130   | 436   | 1,471 | 16   | 219   | 636   | 1,785 |
| 2015        | 9      | 127   | 427   | 1,440 | 16   | 214   | 623   | 1,748 |
| 2016        | 9      | 125   | 418   | 1,410 | 15   | 210   | 610   | 1,711 |
| 2017        | 9      | 122   | 409   | 1,381 | 15   | 205   | 597   | 1,676 |
| 2018        | 9      | 119   | 401   | 1,352 | 15   | 201   | 584   | 1,641 |
| 2019        | 8      | 117   | 393   | 1,324 | 14   | 197   | 572   | 1,607 |
| 2020        | 8      | 114   | 384   | 1,296 | 14   | 193   | 560   | 1,573 |
| 2021        | 8      | 112   | 376   | 1,269 | 14   | 189   | 549   | 1,540 |
| 2022        | 8      | 110   | 369   | 1,243 | 14   | 185   | 537   | 1,508 |
| 2023        | 8      | 107   | 361   | 1,217 | 13   | 181   | 526   | 1,477 |
| 2024        | 8      | 105   | 353   | 1,191 | 13   | 177   | 515   | 1,446 |
| 2025        | 7      | 103   | 346   | 1,167 | 13   | 173   | 504   | 1,416 |
| 2026        | 7      | 101   | 339   | 1,142 | 12   | 170   | 494   | 1,386 |
| 2027        | 7      | 99    | 332   | 1,118 | 12   | 166   | 483   | 1,357 |
| 2028        | 7      | 97    | 325   | 1,095 | 12   | 163   | 473   | 1,329 |
| 2029        | 7      | 95    | 318   | 1,072 | 12   | 159   | 464   | 1,301 |
| 2030        | 7      | 93    | 311   | 1,050 | 11   | 156   | 454   | 1,274 |

Table S2.2: In-patient HF population projection in Canada, 2014- 2030

| Fiscal Year | Number of HF patients hospitalized |                    |                    |
|-------------|------------------------------------|--------------------|--------------------|
|             | Expected                           | 95% CI lower bound | 95% CI upper bound |
| 2014        | 45,834                             | 43,992             | 47,633             |
| 2015        | 46,137                             | 44,164             | 48,078             |
| 2016        | 46,472                             | 44,347             | 48,576             |
| 2017        | 46,922                             | 44,625             | 49,213             |
| 2018        | 47,367                             | 44,884             | 49,861             |
| 2019        | 47,789                             | 45,111             | 50,499             |
| 2020        | 48,203                             | 45,320             | 51,140             |
| 2021        | 48,671                             | 45,572             | 51,850             |
| 2022        | 49,130                             | 45,808             | 52,561             |
| 2023        | 49,683                             | 46,125             | 53,382             |
| 2024        | 50,270                             | 46,466             | 54,250             |
| 2025        | 50,836                             | 46,782             | 55,104             |
| 2026        | 51,435                             | 47,122             | 56,003             |
| 2027        | 52,269                             | 47,672             | 57,165             |
| 2028        | 52,998                             | 48,120             | 58,226             |
| 2029        | 53,622                             | 48,465             | 59,180             |
| 2030        | 54,196                             | 48,759             | 60,089             |

**Projection of annual hospitalization costs per HF patient from FY 2014- 2030**

Annual hospitalization costs per a HF patient are shown in detail in Table S2.3. Total HF annual hospitalization costs are presented in detail in Table S2.4.

**Table S2.3: Annual hospitalization cost per HF patient by sex and age in Canada (in 2014 \$-values), 2014- 2030**

| Fiscal Year | Patient average | Female |        |        |        | Male   |        |        |        |
|-------------|-----------------|--------|--------|--------|--------|--------|--------|--------|--------|
|             |                 | <60    | 60-69  | 70-79  | >=80   | <60    | 60-69  | 70-79  | >=80   |
| 2014        | 11,124          | 11,543 | 11,397 | 10,916 | 10,014 | 11,873 | 11,722 | 11,228 | 10,300 |
| 2015        | 11,280          | 11,705 | 11,556 | 11,069 | 10,154 | 12,039 | 11,886 | 11,385 | 10,445 |
| 2016        | 11,438          | 11,869 | 11,718 | 11,224 | 10,297 | 12,208 | 12,053 | 11,545 | 10,591 |
| 2017        | 11,598          | 12,035 | 11,882 | 11,381 | 10,441 | 12,379 | 12,222 | 11,706 | 10,739 |
| 2018        | 11,761          | 12,203 | 12,049 | 11,540 | 10,587 | 12,552 | 12,393 | 11,870 | 10,890 |
| 2019        | 11,925          | 12,374 | 12,217 | 11,702 | 10,735 | 12,728 | 12,567 | 12,036 | 11,042 |
| 2020        | 12,092          | 12,548 | 12,389 | 11,866 | 10,886 | 12,906 | 12,743 | 12,205 | 11,197 |
| 2021        | 12,262          | 12,723 | 12,562 | 12,032 | 11,038 | 13,087 | 12,921 | 12,376 | 11,354 |
| 2022        | 12,433          | 12,902 | 12,738 | 12,201 | 11,193 | 13,270 | 13,102 | 12,549 | 11,513 |
| 2023        | 12,608          | 13,082 | 12,917 | 12,372 | 11,350 | 13,456 | 13,286 | 12,725 | 11,674 |
| 2024        | 12,784          | 13,266 | 13,097 | 12,545 | 11,509 | 13,645 | 13,472 | 12,903 | 11,837 |
| 2025        | 12,963          | 13,451 | 13,281 | 12,721 | 11,670 | 13,836 | 13,660 | 13,084 | 12,003 |
| 2026        | 13,145          | 13,640 | 13,467 | 12,899 | 11,833 | 14,030 | 13,852 | 13,267 | 12,171 |
| 2027        | 13,329          | 13,831 | 13,656 | 13,080 | 11,999 | 14,226 | 14,046 | 13,453 | 12,342 |
| 2028        | 13,516          | 14,025 | 13,847 | 13,263 | 12,167 | 14,425 | 14,243 | 13,642 | 12,515 |
| 2029        | 13,705          | 14,221 | 14,041 | 13,449 | 12,338 | 14,628 | 14,442 | 13,833 | 12,690 |
| 2030        | 13,897          | 14,420 | 14,238 | 13,637 | 12,510 | 14,832 | 14,644 | 14,027 | 12,868 |



Table S2.4: HF hospitalization cost projection in Canada (in million, 2014 \$-values), 2014-2030

| Fiscal Year | Total HF hospitalization cost |                    |                    |
|-------------|-------------------------------|--------------------|--------------------|
|             | Expected                      | 95% CI lower bound | 95% CI upper bound |
| 2014        | 492                           | 472                | 511                |
| 2015        | 502                           | 481                | 523                |
| 2016        | 513                           | 490                | 536                |
| 2017        | 525                           | 500                | 551                |
| 2018        | 538                           | 510                | 566                |
| 2019        | 550                           | 519                | 582                |
| 2020        | 563                           | 529                | 597                |
| 2021        | 576                           | 540                | 614                |
| 2022        | 590                           | 550                | 631                |
| 2023        | 605                           | 561                | 650                |
| 2024        | 620                           | 573                | 669                |
| 2025        | 635                           | 585                | 689                |
| 2026        | 651                           | 597                | 709                |
| 2027        | 670                           | 611                | 733                |
| 2028        | 688                           | 625                | 757                |
| 2029        | 706                           | 638                | 779                |
| 2030        | 722                           | 650                | 801                |

## Appendix 3: Detailed Results of Estimates and Projection of HF Associated Hospitalization Costs in Canada, FY 2004- 2030

### *Estimates and projection of annual volume of patients with HF from FY 2004- 2030*

We could only examine one turning point in each of the 8 studied groups by Joinpoint regression because of limited number of observations. Seven knots were statistically significant at  $\alpha=0.05$  at 2006 for male/ $\leq 60$ ; at 2007 for female/ $\geq 80$  and male/ $\geq 80$ ; at 2009 for female/60-69, female/70-79, and male/70-79; and at 2010 for male/60-69 groups. Results of the MLR model to predict hospitalized prevalence rates are summarized in Table S3.1. Hospitalization prevalence rate from 2004 to 2030 are shown in detail in Table S3.2. In-patient HF population estimates and projection from 2004 to 2030 are presented in detail in Table S3.3.

Table S3.1: Results of the MLR model to predict hospitalized prevalence rates

| Variable                                                                        | Parameter estimate | 95% CI         | p-value |
|---------------------------------------------------------------------------------|--------------------|----------------|---------|
| Fiscal year                                                                     | -0.047             | -0.051, -0.043 | <0.001  |
| Sex                                                                             |                    |                |         |
| Male                                                                            | 0.202              | 0.179, 0.224   | <0.001  |
| Female (ref)                                                                    | --                 |                | --      |
| Age group                                                                       |                    |                |         |
| <60 years                                                                       | -4.914             | -4.937, -4.891 | <0.001  |
| 60-69 years                                                                     | -2.394             | -2.417, -2.370 | <0.001  |
| 70-79 years                                                                     | -1.208             | -1.231, -1.184 | <0.001  |
| $\geq 80$ years (ref)                                                           | --                 | --             | --      |
| Knot                                                                            | 0.038              | 0.032, 0.044   | <0.001  |
| Interaction                                                                     |                    |                |         |
| Sex/<60 years                                                                   | 0.223              | 0.191, 0.255   | <0.001  |
| Sex/60-69 years                                                                 | 0.213              | 0.181, 0.245   | <0.001  |
| Sex/70-79 years                                                                 | 0.125              | 0.093, 0.157   | 0.002   |
| Adjusted R-square=0.999; Intercept= 26.351; Model assumptions' check satisfied. |                    |                |         |

Table S3.2: HF associated hospitalization prevalence rate per 100,000 populations by sex and age in Canada, 2004- 2030

| Fiscal Year | Female |       |       |       | Male |       |       |       |
|-------------|--------|-------|-------|-------|------|-------|-------|-------|
|             | <60    | 60-69 | 70-79 | >=80  | <60  | 60-69 | 70-79 | >=80  |
| 2004        | 32     | 475   | 1,554 | 4,820 | 52   | 747   | 2,156 | 5,897 |
| 2005        | 31     | 453   | 1,483 | 4,599 | 50   | 712   | 2,057 | 5,627 |
| 2006        | 31     | 432   | 1,415 | 4,388 | 47   | 680   | 1,962 | 5,369 |
| 2007        | 31     | 412   | 1,350 | 4,187 | 47   | 649   | 1,872 | 5,123 |
| 2008        | 30     | 394   | 1,288 | 4,150 | 47   | 619   | 1,787 | 5,077 |
| 2009        | 30     | 376   | 1,229 | 4,113 | 46   | 591   | 1,705 | 5,032 |
| 2010        | 30     | 372   | 1,218 | 4,076 | 46   | 563   | 1,690 | 4,987 |
| 2011        | 30     | 369   | 1,207 | 4,040 | 45   | 558   | 1,674 | 4,942 |
| 2012        | 29     | 366   | 1,197 | 4,004 | 45   | 553   | 1,659 | 4,898 |
| 2013        | 29     | 362   | 1,186 | 3,968 | 45   | 549   | 1,645 | 4,854 |
| 2014        | 29     | 359   | 1,175 | 3,932 | 44   | 544   | 1,630 | 4,811 |
| 2015        | 29     | 356   | 1,165 | 3,897 | 44   | 539   | 1,615 | 4,768 |
| 2016        | 28     | 353   | 1,154 | 3,862 | 43   | 534   | 1,601 | 4,725 |
| 2017        | 28     | 350   | 1,144 | 3,828 | 43   | 529   | 1,587 | 4,683 |
| 2018        | 28     | 346   | 1,134 | 3,794 | 43   | 524   | 1,572 | 4,641 |
| 2019        | 28     | 343   | 1,124 | 3,760 | 42   | 520   | 1,558 | 4,600 |
| 2020        | 27     | 340   | 1,114 | 3,726 | 42   | 515   | 1,545 | 4,559 |
| 2021        | 27     | 337   | 1,104 | 3,693 | 41   | 511   | 1,531 | 4,518 |
| 2022        | 27     | 334   | 1,094 | 3,660 | 41   | 506   | 1,517 | 4,478 |
| 2023        | 27     | 331   | 1,084 | 3,627 | 41   | 501   | 1,503 | 4,438 |
| 2024        | 26     | 328   | 1,075 | 3,595 | 40   | 497   | 1,490 | 4,398 |
| 2025        | 26     | 325   | 1,065 | 3,563 | 40   | 493   | 1,477 | 4,359 |
| 2026        | 26     | 322   | 1,055 | 3,531 | 40   | 488   | 1,464 | 4,320 |
| 2027        | 26     | 320   | 1,046 | 3,499 | 39   | 484   | 1,450 | 4,281 |
| 2028        | 25     | 317   | 1,037 | 3,468 | 39   | 479   | 1,438 | 4,243 |
| 2029        | 25     | 314   | 1,027 | 3,437 | 39   | 475   | 1,425 | 4,205 |
| 2030        | 25     | 311   | 1,018 | 3,406 | 38   | 471   | 1,412 | 4,168 |

Table S3.3: In-patient HF population estimates and projection in Canada, 2004- 2030

| Fiscal Year | Number of patients hospitalized with HF |                    |                    |
|-------------|-----------------------------------------|--------------------|--------------------|
|             | Expected                                | 95% CI lower bound | 95% CI upper bound |
| 2004        | 116,773                                 | 114,443            | 119,076            |
| 2005        | 114,542                                 | 112,455            | 116,594            |
| 2006        | 112,700                                 | 110,749            | 114,613            |
| 2007        | 110,776                                 | 108,871            | 112,642            |
| 2008        | 110,985                                 | 109,133            | 112,798            |
| 2009        | 111,196                                 | 109,318            | 113,036            |
| 2010        | 112,971                                 | 111,064            | 114,837            |
| 2011        | 115,132                                 | 113,155            | 117,069            |
| 2012        | 117,613                                 | 115,497            | 119,693            |
| 2013        | 120,134                                 | 117,818            | 122,417            |
| 2014        | 122,293                                 | 119,734            | 124,827            |
| 2015        | 124,569                                 | 121,722            | 127,402            |
| 2016        | 126,968                                 | 123,792            | 130,143            |
| 2017        | 129,718                                 | 126,173            | 133,278            |
| 2018        | 132,506                                 | 128,561            | 136,486            |
| 2019        | 135,282                                 | 130,911            | 139,710            |
| 2020        | 138,083                                 | 133,261            | 142,989            |
| 2021        | 141,094                                 | 135,791            | 146,513            |
| 2022        | 144,139                                 | 138,330            | 150,098            |
| 2023        | 147,518                                 | 141,166            | 154,058            |
| 2024        | 151,065                                 | 144,141            | 158,222            |
| 2025        | 154,616                                 | 147,097            | 162,417            |
| 2026        | 158,346                                 | 150,198            | 166,830            |
| 2027        | 162,894                                 | 154,048            | 172,140            |
| 2028        | 167,202                                 | 157,644            | 177,227            |
| 2029        | 171,245                                 | 160,967            | 182,065            |
| 2030        | 175,201                                 | 164,185            | 186,838            |

**Estimates and projection of annual hospitalization costs per patient with HF from FY 2004- 2030**

Results of the GLM model to predict annual hospitalization costs per patient with HF are summarized in Table S3.4. Annual hospitalization costs per patient with HF are shown in Table S3.5. Total HF associated hospitalization cost estimates and projection are presented in Table S3.6.

**Table S3.4: Results of the GLM model to predict annual costs per patient with HF hospitalized**

| Variable                                                       | Parameter estimate | 95% CI         | p-value |
|----------------------------------------------------------------|--------------------|----------------|---------|
| Fiscal year                                                    | 0.013              | 0.010, 0.015   | <0.001  |
| Sex                                                            |                    |                |         |
| Male                                                           | 0.069              | 0.063, 0.075   | <0.001  |
| Female (ref)                                                   |                    |                | --      |
| Age group                                                      |                    |                |         |
| <60 years (ref)                                                | --                 | --             | --      |
| 60-69 years                                                    | -0.024             | -0.039, -0.009 | 0.002   |
| 70-79 years                                                    | -0.079             | -0.093, -0.065 | <0.001  |
| >=80 years                                                     | -0.209             | -0.222, -0.196 | <0.001  |
| Intercept= -16.017; gamma distribution and log link were used. |                    |                |         |

Table S3.5: Annual hospitalization cost per patient with HF by sex and age in Canada (in 2014 \$-values), 2004- 2030

| Fiscal Year | Patient average | Female |        |        |        | Male   |        |        |        |
|-------------|-----------------|--------|--------|--------|--------|--------|--------|--------|--------|
|             |                 | <60    | 60-69  | 70-79  | >=80   | <60    | 60-69  | 70-79  | >=80   |
| 2004        | 12,302          | 12,800 | 12,498 | 11,824 | 10,388 | 13,714 | 13,391 | 12,668 | 11,130 |
| 2005        | 12,459          | 12,963 | 12,658 | 11,975 | 10,521 | 13,889 | 13,563 | 12,831 | 11,272 |
| 2006        | 12,618          | 13,129 | 12,820 | 12,128 | 10,655 | 14,067 | 13,736 | 12,995 | 11,416 |
| 2007        | 12,780          | 13,297 | 12,984 | 12,284 | 10,792 | 14,247 | 13,912 | 13,161 | 11,562 |
| 2008        | 12,943          | 13,467 | 13,150 | 12,441 | 10,930 | 14,429 | 14,090 | 13,329 | 11,710 |
| 2009        | 13,109          | 13,640 | 13,319 | 12,600 | 11,069 | 14,614 | 14,270 | 13,500 | 11,860 |
| 2010        | 13,277          | 13,814 | 13,489 | 12,761 | 11,211 | 14,801 | 14,453 | 13,673 | 12,012 |
| 2011        | 13,446          | 13,991 | 13,662 | 12,924 | 11,355 | 14,990 | 14,637 | 13,847 | 12,166 |
| 2012        | 13,618          | 14,170 | 13,836 | 13,090 | 11,500 | 15,182 | 14,825 | 14,025 | 12,321 |
| 2013        | 13,793          | 14,351 | 14,013 | 13,257 | 11,647 | 15,376 | 15,014 | 14,204 | 12,479 |
| 2014        | 13,969          | 14,535 | 14,193 | 13,427 | 11,796 | 15,573 | 15,206 | 14,386 | 12,638 |
| 2015        | 14,148          | 14,721 | 14,374 | 13,598 | 11,947 | 15,772 | 15,401 | 14,570 | 12,800 |
| 2016        | 14,329          | 14,909 | 14,558 | 13,772 | 12,100 | 15,974 | 15,598 | 14,756 | 12,964 |
| 2017        | 14,512          | 15,100 | 14,744 | 13,949 | 12,254 | 16,178 | 15,797 | 14,945 | 13,130 |
| 2018        | 14,698          | 15,293 | 14,933 | 14,127 | 12,411 | 16,385 | 16,000 | 15,136 | 13,298 |
| 2019        | 14,886          | 15,488 | 15,124 | 14,308 | 12,570 | 16,595 | 16,204 | 15,330 | 13,468 |
| 2020        | 15,076          | 15,687 | 15,317 | 14,491 | 12,731 | 16,807 | 16,412 | 15,526 | 13,640 |
| 2021        | 15,269          | 15,887 | 15,513 | 14,676 | 12,894 | 17,022 | 16,622 | 15,724 | 13,815 |
| 2022        | 15,464          | 16,090 | 15,712 | 14,864 | 13,059 | 17,240 | 16,834 | 15,926 | 13,991 |
| 2023        | 15,662          | 16,296 | 15,913 | 15,054 | 13,226 | 17,460 | 17,050 | 16,129 | 14,170 |
| 2024        | 15,863          | 16,505 | 16,116 | 15,247 | 13,395 | 17,684 | 17,268 | 16,336 | 14,352 |
| 2025        | 16,066          | 16,716 | 16,323 | 15,442 | 13,566 | 17,910 | 17,489 | 16,545 | 14,535 |
| 2026        | 16,271          | 16,930 | 16,531 | 15,639 | 13,740 | 18,139 | 17,712 | 16,756 | 14,721 |
| 2027        | 16,479          | 17,146 | 16,743 | 15,839 | 13,916 | 18,371 | 17,939 | 16,971 | 14,909 |
| 2028        | 16,690          | 17,366 | 16,957 | 16,042 | 14,094 | 18,606 | 18,168 | 17,188 | 15,100 |
| 2029        | 16,904          | 17,588 | 17,174 | 16,247 | 14,274 | 18,844 | 18,401 | 17,408 | 15,293 |
| 2030        | 17,120          | 17,813 | 17,394 | 16,455 | 14,456 | 19,085 | 18,636 | 17,630 | 15,489 |

Table S3.6: HF associated hospitalization cost estimates and projection in Canada (in million, 2014 \$-values), 2004- 2030

| Fiscal Year | Total HF associated hospitalization costs |                    |                    |
|-------------|-------------------------------------------|--------------------|--------------------|
|             | Expected                                  | 95% CI lower bound | 95% CI upper bound |
| 2004        | 1,370                                     | 1,342              | 1,397              |
| 2005        | 1,360                                     | 1,335              | 1,384              |
| 2006        | 1,354                                     | 1,331              | 1,377              |
| 2007        | 1,348                                     | 1,325              | 1,371              |
| 2008        | 1,367                                     | 1,344              | 1,389              |
| 2009        | 1,385                                     | 1,361              | 1,408              |
| 2010        | 1,424                                     | 1,400              | 1,448              |
| 2011        | 1,469                                     | 1,444              | 1,494              |
| 2012        | 1,520                                     | 1,493              | 1,547              |
| 2013        | 1,572                                     | 1,542              | 1,602              |
| 2014        | 1,622                                     | 1,588              | 1,655              |
| 2015        | 1,673                                     | 1,635              | 1,711              |
| 2016        | 1,728                                     | 1,685              | 1,771              |
| 2017        | 1,789                                     | 1,740              | 1,838              |
| 2018        | 1,851                                     | 1,796              | 1,907              |
| 2019        | 1,914                                     | 1,853              | 1,977              |
| 2020        | 1,979                                     | 1,910              | 2,049              |
| 2021        | 2,048                                     | 1,971              | 2,126              |
| 2022        | 2,118                                     | 2,033              | 2,206              |
| 2023        | 2,195                                     | 2,100              | 2,292              |
| 2024        | 2,275                                     | 2,171              | 2,382              |
| 2025        | 2,356                                     | 2,242              | 2,475              |
| 2026        | 2,441                                     | 2,316              | 2,572              |
| 2027        | 2,539                                     | 2,401              | 2,683              |
| 2028        | 2,635                                     | 2,485              | 2,793              |
| 2029        | 2,729                                     | 2,566              | 2,901              |
| 2030        | 2,824                                     | 2,647              | 3,011              |
